# Supplementary material for: An RNA-Binding Protein, Hu-antigen R, in Pancreatic Cancer Epithelial to Mesenchymal Transition, Metastasis, and Cancer Stem Cells
Source: Oxford University Press journal article supplement (doi:10.1158/1535-7163.mct-19-0822), 2020-09-02
Supplement: 15357163mct190822-sup-227906_3_supp_6448478_qdxljs.docx [file 15357163mct190822-sup-227906_3_supp_6448478_qdxljs.docx]

**An RNA-binding protein, Hu-antigen R, in pancreatic cancer epithelial to mesenchymal transition, metastasis, and cancer stem cells**

**Supplement Data**

**
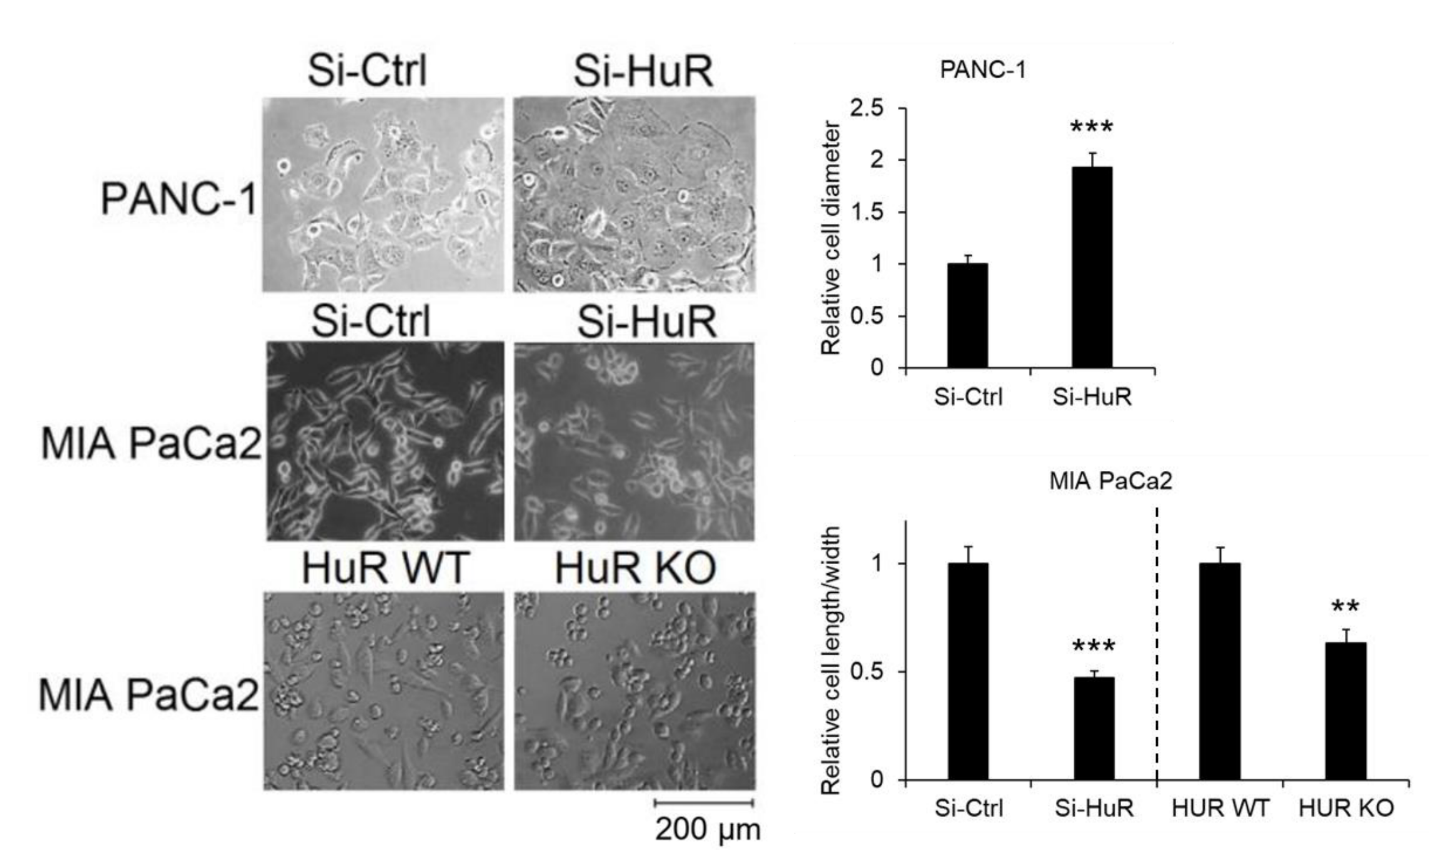
**

**Supplement Fig.1 Morphologies of PANC-1 and MIA PaCa-2 cells with and without HuR knockdown.** Si-HuR were cells transfected with si-RNA targeting HuR mRNA, and Si-Ctrl were cells transfected with scramble si-RNA. Cells were imaged 24 h after transfection. HuR KO were MIA PaCa cells deleted of HuR gene by CRISPR/Cas9 procedure. HuR WT were MIA PaCa-2 cells transfected with control sgRNA.


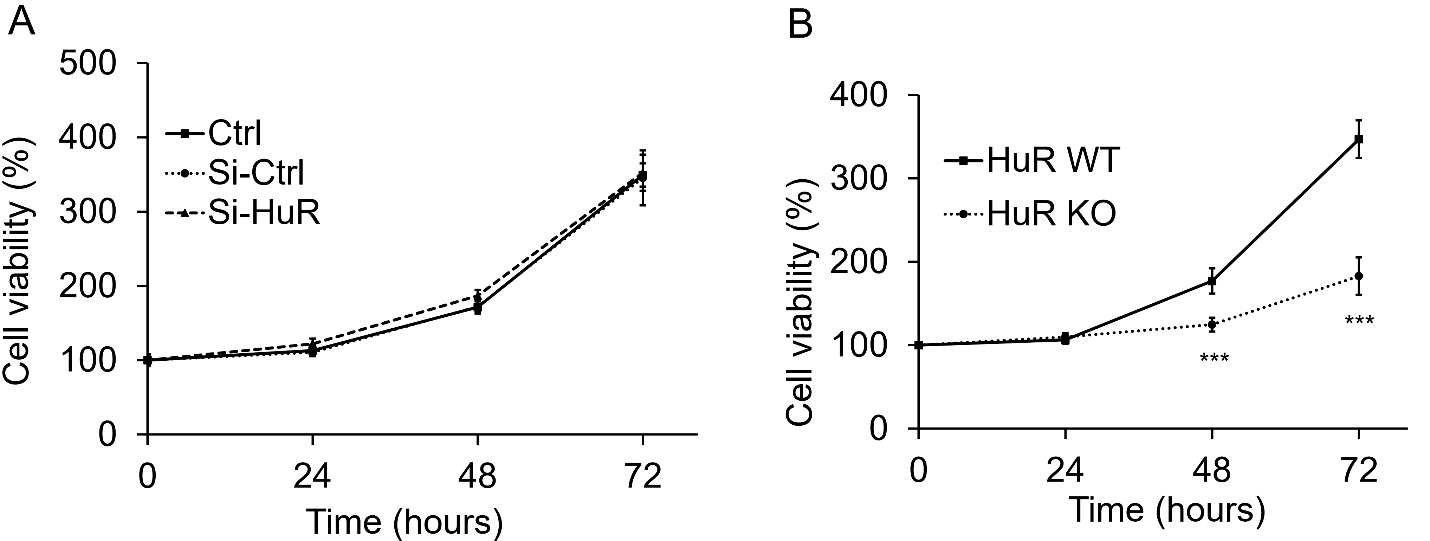


**Supplement Fig. 2 Growth curves of MIA PaCa-2 cells with HuR knockdown. A.** Si-HuR , cells transfected with si-RNA targeting HuR mRNA; Si-Ctrl, cells transfected with scramble si-RNA; Ctrl, cells not transfected. **B.** HuR KO, cells deleted of HuR gene by CRISPR/Cas9 procedure; HuR WT, cells transfected with control sgRNA. All cells were plated in 96-well plated at the density of 3,000 cell/ well. Cell viabilities were detected by MTT assay at 0, 24, 48, and 72 h. Data represents Mean ± SD of 4 experiments each done in 8 repeats. ***, p<0.001 with Student T-test.


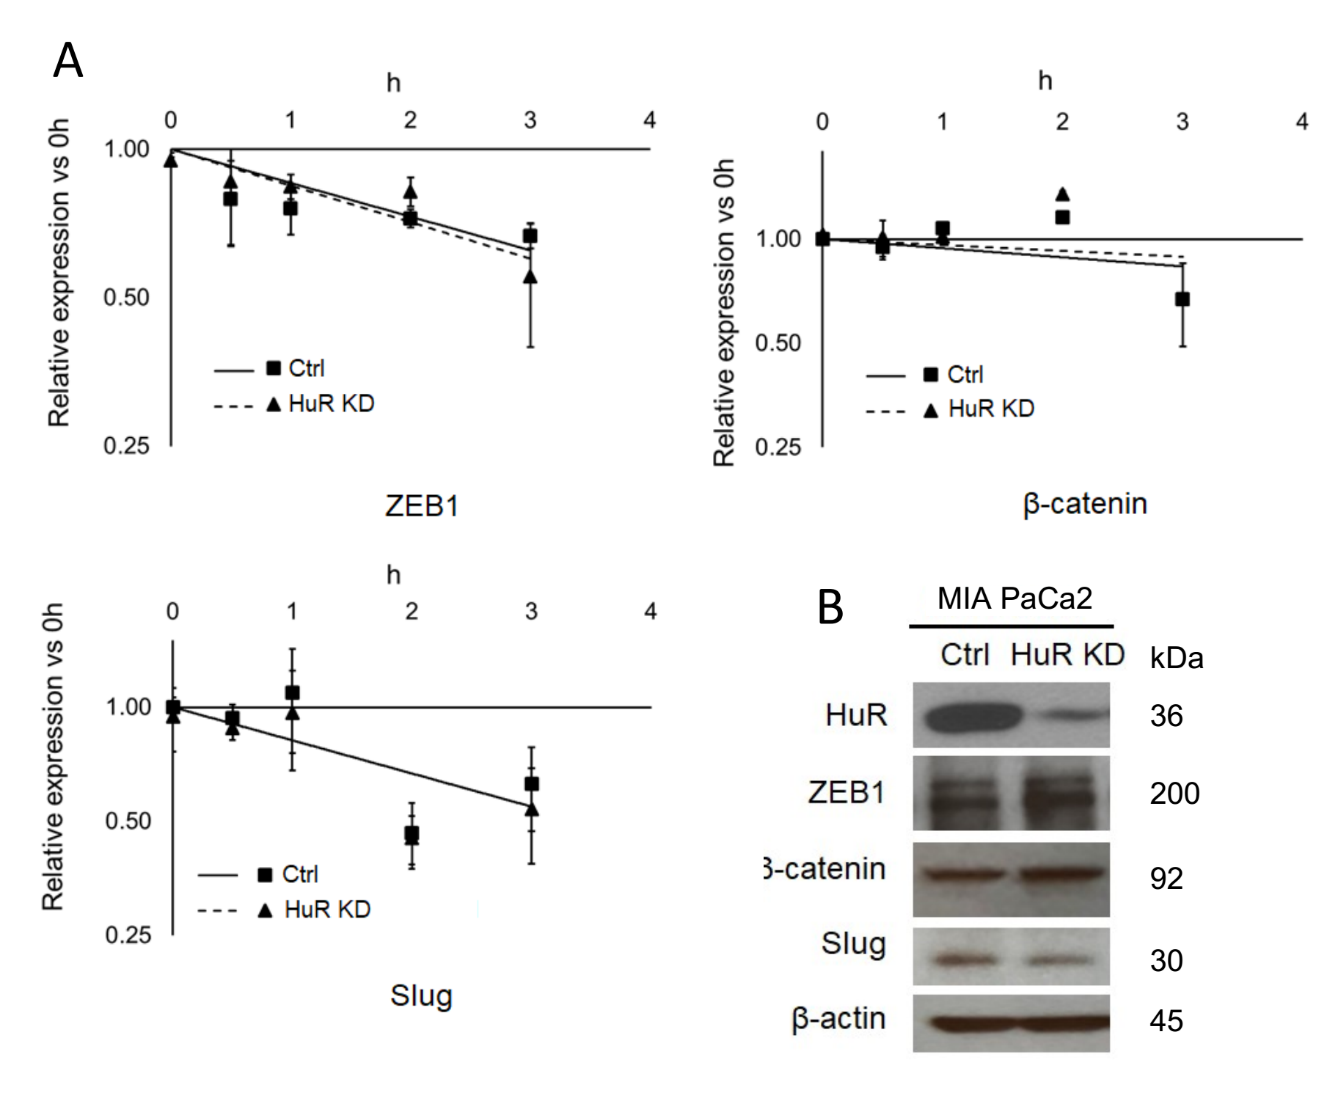


**Supplement Fig. 3 mRNA stabilities and protein expression of ZEB1, β-catenin and Slug with HuR knockdown. A.** mRNA stabilities detected by qRT-PCR. MIA PaCa2 cells were transfected with either Si-Ctrl or Si-HuR for 24 h. Transcription was then blocked by actinomycin D (5 µg/ml) treatment 4 h before the first sample was collected (0 h). **B**. Protein expression detected by western blot. HuR KD indicated for MIA PaCa-2 cells with HuR knockdown 24 h after Si-HuR transfection.

**
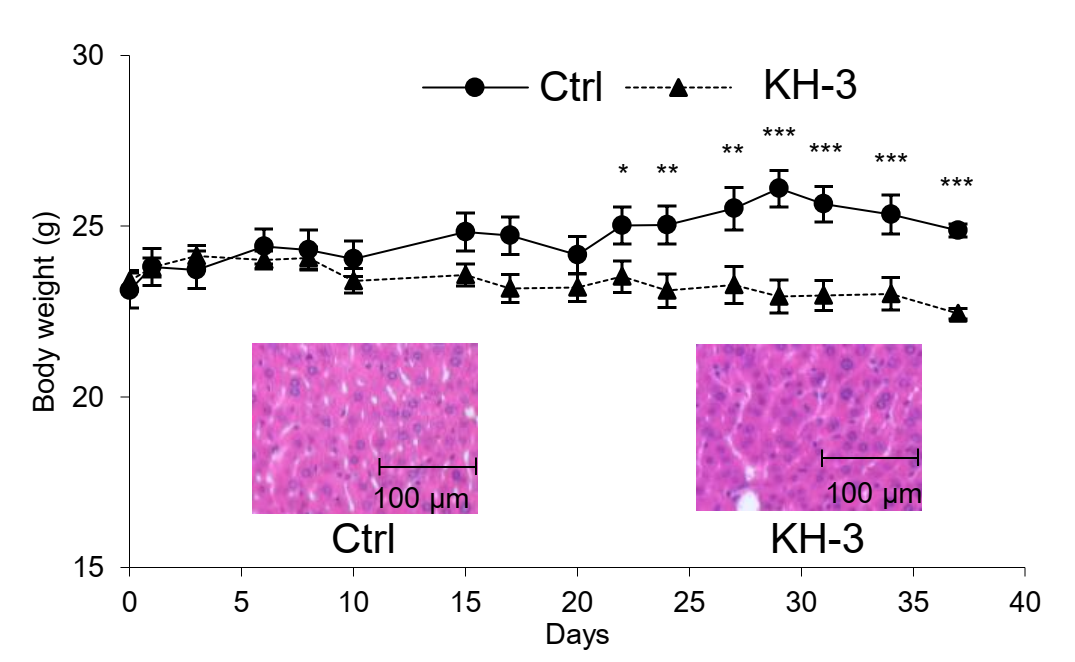
**

**Supplement Fig. 4 Body weight and liver histology of mice bearing PANC-1 tumors.** KH-3, 100 mg/kg 3x weekly IP. Ctrl, vehicle control.
